# Supplementary material for: Boron enhances oxygen evolution reaction activity over Ni foam-supported iron boride nanowires
Source: Royal Society of Chemistry journal article supplement (doi:10.1039/c9ta14256h), 2020-01-01
Supplement: c9ta14256h1.pdf [file c9ta14256h1.pdf]

## Supporting Information

# **Boron Enhances Oxygen Evolution Reaction Activity over Ni Foam-Supported Iron Boride Nanowires**

Qinghua Liu,<sup>a,b</sup> Hui Zhao,<sup>a</sup> Meng Jiang,<sup>a</sup> Qing Kang,<sup>\*a</sup> Wei Zhou,<sup>\*c</sup> Pengcheng Wang,<sup>a</sup> Feimeng Zhou<sup>a</sup>

*<sup>a</sup>Institute of Surface Analysis and Chemical Biology, University of Jinan, Jinan, Shandong 250022, P. R. China*

*<sup>b</sup>College of Chemistry and Chemical Engineering, Central South University, Changsha, Hunan 410083, P. R. China*

*<sup>c</sup>Department of Applied Physics, Tianjin Key Laboratory of Low Dimensional Materials Physics and Preparing Technology, Tianjin University, Tianjin, 300072, P.R. China*

---

\* Corresponding author E-mail: [ila\\_kangq@ujn.edu.cn](mailto:ila_kangq@ujn.edu.cn)

\* Corresponding author E-mail: [weizhou@tju.edu.cn](mailto:weizhou@tju.edu.cn)

## **Experimental Details**

### **Chemicals and Materials**

Ni Foams (NFs, 99.9% purity, 98% porosity, and 1.80 mm in thickness) and Ni plates (99.9% purity and 1.80 mm in thickness) were purchased from Incoatm Co. Ltd (Shenyang, China). A Pt plate (purity  $\geq$  99.99% and 0.2 mm in thickness) and a graphite plate (99.95% purity and 0.2 mm in thickness) were acquired from Ida Co. Ltd (Tianjin, China). HCl, KOH, NaOH,  $\text{FeCl}_2 \cdot 4\text{H}_2\text{O}$ ,  $\text{NaBH}_4$ , and other reagents were of analytical grade and purchased from Aladdin Co. Ltd (Shanghai, China) and used as received. Deionized water was used throughout the experiments.

### **Electrocatalyst preparation**

NFs were ultrasonically cleaned with 3 M HCl solution, 95% ethanol, and deionized water three times to remove nickel oxide and other impurities. Each piece of NF ( $20 \times 10 \times 1.8$  mm) was immersed in a metal precursor aqueous solution containing 0.70 M  $\text{FeCl}_2 \cdot 4\text{H}_2\text{O}$ . Each NF was placed inside a reaction vessel with the surface normal to the magnetic field from a magnetic stirrer (magnetic intensity of 15 mT). The reaction vessel was maintained below 10 °C in an ice-bath. A mixture of 0.70 M  $\text{NaBH}_4$  and 0.25 M NaOH was slowly added into the metal precursor aqueous solution using a syringe until a 1:1 volumetric ratio was reached.  $\text{Fe}_2\text{B}$  NWs were deposited on each piece of NF using  $\text{NaBH}_4$ , which served as both the reducing agent and a source of boron. The resultant solution was aged for 30 min. The precipitate was collected by filtration. The  $\text{Fe}_2\text{B}$  NWs/NF and collected  $\text{Fe}_2\text{B}$  powder were rinsed with deionized water and ethanol, dried in vacuo at 30 °C, and stored in a glove box (Mbraun, Munich, Germany) circulated with Ar. The  $\text{Fe}_2\text{B}$  nanoparticles (NPs)/NF was synthesised using the same method as for the  $\text{Fe}_2\text{B}$  NWs/NF except the former was performed in the absence of a magnetic field. The mass loadings of  $\text{Fe}_2\text{B}$  NWs and NPs were both  $\sim 1$  mg. Since the

geometric area of the NF substrate (both sides) is about 4 cm<sup>2</sup>, the amounts of Fe<sub>2</sub>B NWs and NPs loading were 0.25 mg/cm<sup>2</sup>.

For comparison purposes, Fe NPs/NF was prepared by an electrodeposition process. The electrodeposition of Fe was conducted in 6 mM Fe(NO<sub>3</sub>)<sub>3</sub> under a constant potential of -1.0 V with NF, Ag/AgCl and Pt plate serving as the working, reference, and auxiliary electrodes. After electrodeposition for 600 s, each Fe NPs/NF was carefully removed from the electrolyte and treated using a procedure similar to that for the Fe<sub>2</sub>B NWs/NF catalyst. The loading amount of Fe NPs was about 0.25 mg/cm<sup>2</sup>.

### **Characterization**

Elemental analysis was performed using inductively coupled plasma-optical emission spectroscopy (ICP-OES, Optima 5300DV, Perkin Elmer). The phase structures of the catalyst samples were analyzed with Cu K $\alpha$  radiation ( $\lambda = 1.54178 \text{ \AA}$ ) from an X-ray diffractometer (XRD, D8 advance diffractometer). The morphology and microstructure of the catalyst were examined with a field-emission scanning electron microscopy (SEM, JEOL JSM 6700F) and a transmission electron microscopy (TEM, JEOL JEM 2100F), both equipped with the energy dispersive X-ray spectroscopic (EDS) mode (Oxford, INCA). Fourier transform infrared (FT-IR) spectra were recorded on a Thermo-Nicolet 6700 spectrometer. The chemical states of the constituent elements of the catalyst were analyzed with an XPS instrument equipped with a monochromatized Al source (1486.6 eV) and a 160 mm concentric hemispherical energy analyzer (Shimadzu, AXIS Ultra Supra). The binding energies (BEs) were determined using the C 1s peak (at 284.8 eV) from adventitious carbon as the reference. Hydrophilicity was measured using a contact angle measurement system (KSV instruments).

### **Electrochemical measurements**

All electrochemical measurements were performed in a conventional three-electrode cell using a CHI 760E electrochemical analyzer. The OER catalysts, a graphite plate and a Hg/HgO were used as the working, counter, and reference electrode. The potentials measured vs. Hg/HgO were converted to reversible hydrogen electrode (RHE), according to the equation,  $E_{\text{RHE}} = E_{\text{Hg/HgO}} + 0.098 + 0.059 \times \text{pH}$ . The electrochemical performance of the catalysts was investigated in an oxygen-saturated 1 M KOH solution. Before recording the polarization curves, potential was cycled five times between 1.22 and 1.72 V vs. RHE at 100 mV/s. The polarization curves were recorded by scanning from 1.22 to 1.72 V vs. RHE at 2 mV/s with 90%  $iR$  compensation. The electrochemical impedance spectroscopy was performed at open circuit potential with an amplitude of 5 mV in the frequency range from 100 kHz to 0.1 Hz. The curve fitting was performed by Zview2 software. The electrochemical surface areas (ECSA) of the catalysts were calculated from their double-layer capacitance ( $C_{\text{dl}}$ ), which were determined from the scan-rate dependence of capacitive current.<sup>1</sup> The roughness factor (RF) was calculated by dividing the estimated ECSA by the geometric area of the electrode in the electrolyte (1 cm<sup>2</sup>). The mass activity of the Fe<sub>2</sub>B NWs/NF catalyst was calculated according to mass activity =  $J_{\text{ECSA}} \times A/m$ , where  $J_{\text{ECSA}}$  is the current density normalized to the estimated ECSA of the Fe<sub>2</sub>B NWs/NF catalyst,  $A$  the estimated ECSA of the Fe<sub>2</sub>B NWs/NF catalyst, and  $m$  the loading mass of Fe<sub>2</sub>B NWs.

$$A = \frac{\text{The total specific capacitance of Fe}_2\text{B NWs/NF}}{\text{The specific capacitance of per ECSA}} = \frac{1.2 \text{ mF/cm}^2}{40 \text{ uF/cm}^2 \text{ per cm}^2} = 30 \text{ cm}^2$$

The turnover frequency (TOF) was defined as the number of O<sub>2</sub> molecules produced per second per active site:

$$\begin{aligned} n_{\text{O}_2} &= \left( J_{\text{ECSA}} \frac{\text{mA}}{\text{cm}^2} \right) \left( \frac{1 \text{ C/s}}{1000 \text{ mA}} \right) \left( \frac{1 \text{ mol } e^-}{96485.3 \text{ C}} \right) \left( \frac{1 \text{ mol } \text{O}_2}{4 \text{ mol } e^-} \right) \left( \frac{6.022 \times 10^{23} \text{ O}_2 \text{ molecules}}{1 \text{ mol } \text{O}_2} \right) \\ &= (1.56 \times 10^{15} \frac{1}{\text{s}} \frac{\text{per}}{\text{cm}^2}) \times \left( J_{\text{ECSA}} \frac{\text{mA}}{\text{cm}^2} \right) \end{aligned}$$

We assume all of the surface Fe and B atoms as the number of active sites. The volume of each unit cell of Fe<sub>2</sub>B (eight iron and four boron atoms) is 111.66 Å<sup>3</sup>.<sup>2</sup> Thus,

$$n_{active\ sites} = \left( \frac{12\ atoms/unit\ cell}{111.66\ \text{\AA}^3/unit\ cell} \right)^{2/3} = 2.26 \times 10^{15}\ atoms/cm^2$$

$$TOF = \frac{(1.56 \times 10^{15} \frac{1}{s} \frac{mA}{cm^2}) \times (J_{ECSA} \frac{mA}{cm^2})}{(2.26 \times 10^{15}\ atoms/cm^2) \times (A\ cm^2)} = 0.023 \times J_{ECSA} (s^{-1})$$

### Determination of Faradaic efficiency

The amount of O<sub>2</sub> generated in OER was measured using a classic water drainage method.<sup>3</sup> The Faradaic efficiency was deduced by comparing the experimentally measured gas amount with the theoretically calculated value. Specifically, the efficiency was calculated from  $(m \times n \times F)/(I \times t)$ , where  $m$  is the product in moles,  $n$  the number of electrons transferred,  $F$  the Faraday constant,  $I$  the current value, and  $t$  the reaction time.

### Computational methods

All calculations in this work were performed with the Vienna ab initio simulation package (VASP) based on the density functional theory (DFT).<sup>4</sup> The generalized gradient approximation was used for the exchange-correlation energy. The spin polarization was taken into account with a cutoff energy of 400 eV. A vacuum region of 18 Å was used to eliminate interactions between the neighboring slab models. Monkhorst k-point meshes of 3 × 3 × 1 were used for the Brillouin-zone integrations of slab supercell models. The total energy converges within an error of 1 × 10<sup>-5</sup> eV/atom, and all atoms were relaxed until the residual force was less than 0.02 eV/Å during relaxation. The DFT-D2 method proposed by Grimme et al. was adopted to describe the van der Waals interactions.<sup>5</sup> The OER performance was evaluated by computing the change of Gibbs free energy ( $\Delta G$ ) based on the spin-polarized calculation via the following equation:

$$\Delta G = \Delta E + \Delta E_{ZPE} + \Delta H - T\Delta S$$

where  $\Delta E$  is the energy difference for a given intermediate before and after adsorbed on the surface of slab models,  $\Delta E_{\text{ZPE}}$ ,  $\Delta H$  and  $\Delta S$  the differences in the zero-point energy, enthalpy and entropy between the adsorbed state and the corresponding free-standing state.

## Results and Discussion

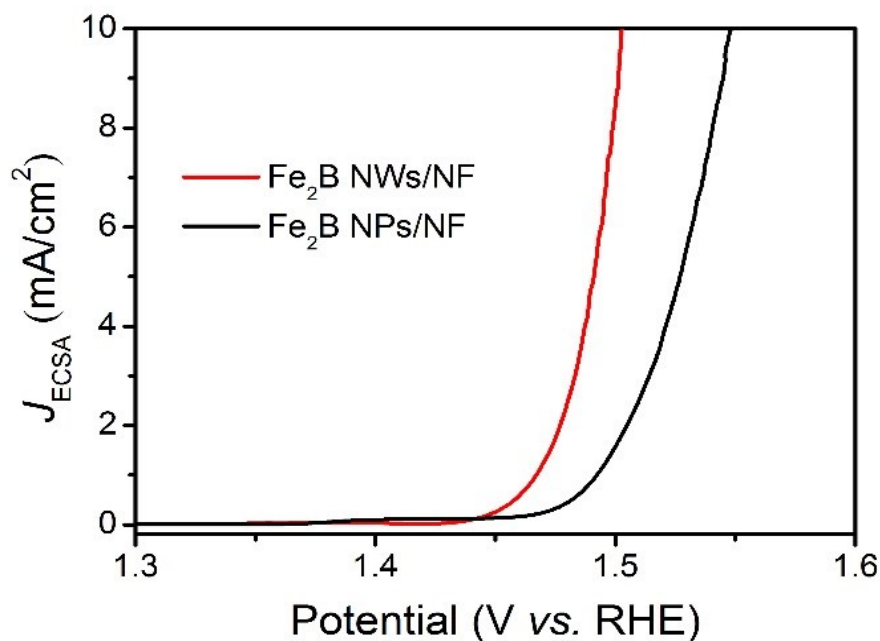

**Fig. S1** OER polarization curves of the Fe<sub>2</sub>B NWs/NF and Fe<sub>2</sub>B NPs/NF.

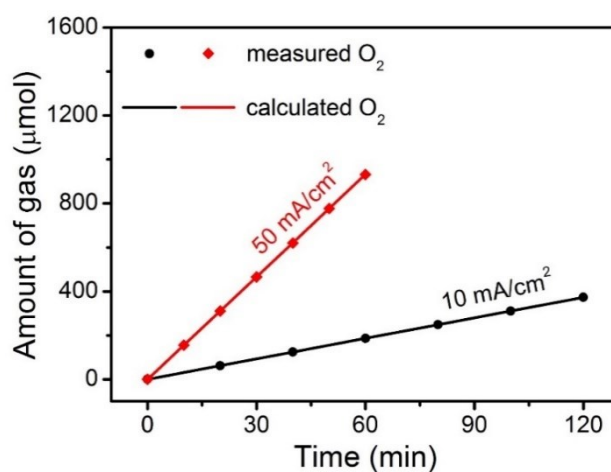

**Fig. S2** Experimentally measured O<sub>2</sub> evolution vs. theoretically calculated quantities under constant current densities of 10 and 50 mA/cm<sup>2</sup>.

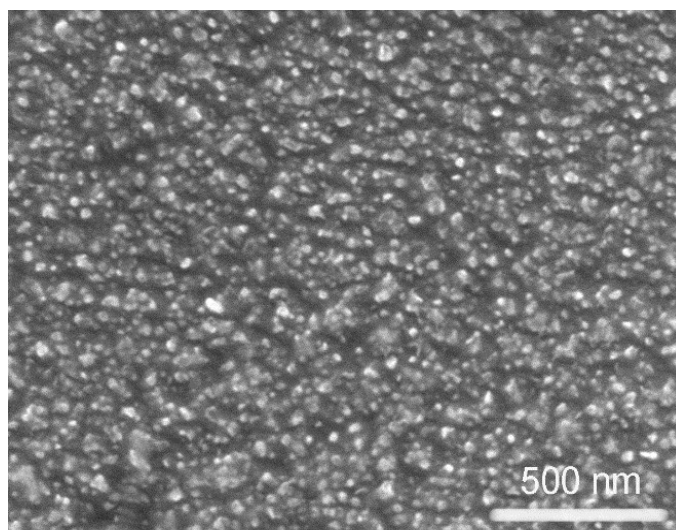

Fig. S3 A field-emission SEM image of the  $\text{Fe}_2\text{B}$  NPs/NF.

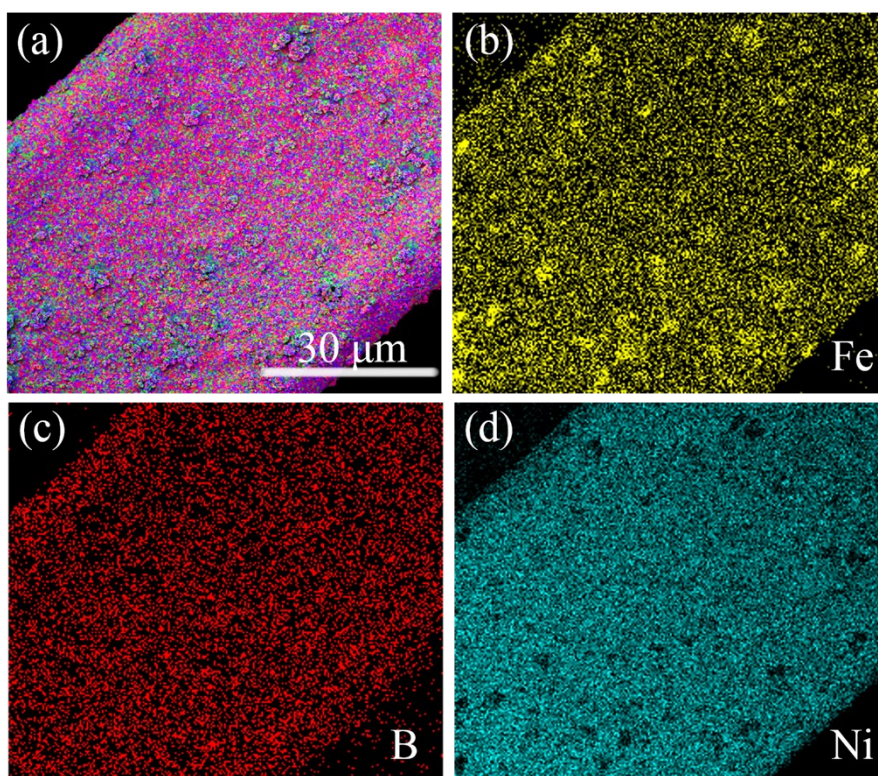

**Fig. S4** A field emission-SEM image (a) of the  $\text{Fe}_2\text{B}$  NPs/NF and the EDS elemental maps corresponding to Fe (b), B (c), and Ni (d).

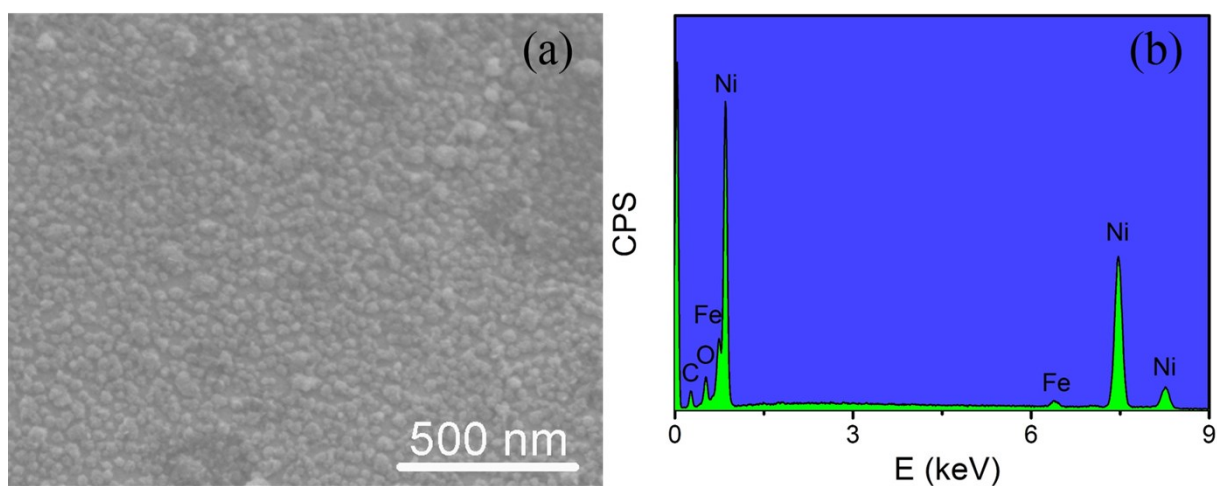

**Fig. S5** (a) A field-emission SEM image and (b) its corresponding EDS spectrum of the Fe NPs/NF.

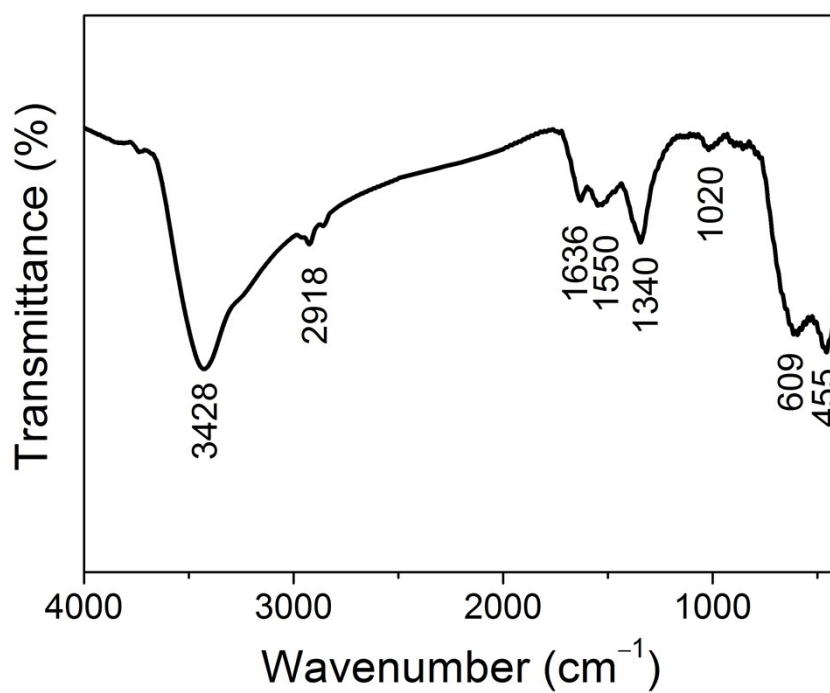

**Fig. S6** An FT-IR spectrum of the  $\text{Fe}_2\text{B}$  NWs/NF after OER.



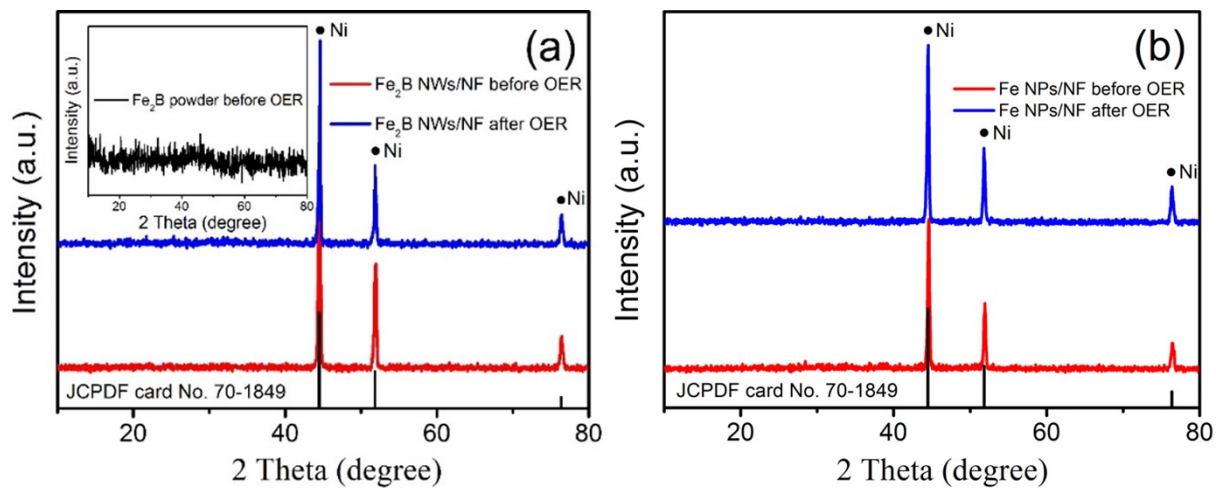

**Fig. S7** XRD patterns of (a) Fe<sub>2</sub>B NWs/NF and (b) Fe NPs/NF before and after OER. The insert in (a) shows the XRD pattern of the corresponding Fe<sub>2</sub>B powder scraped from the NFs before OER.

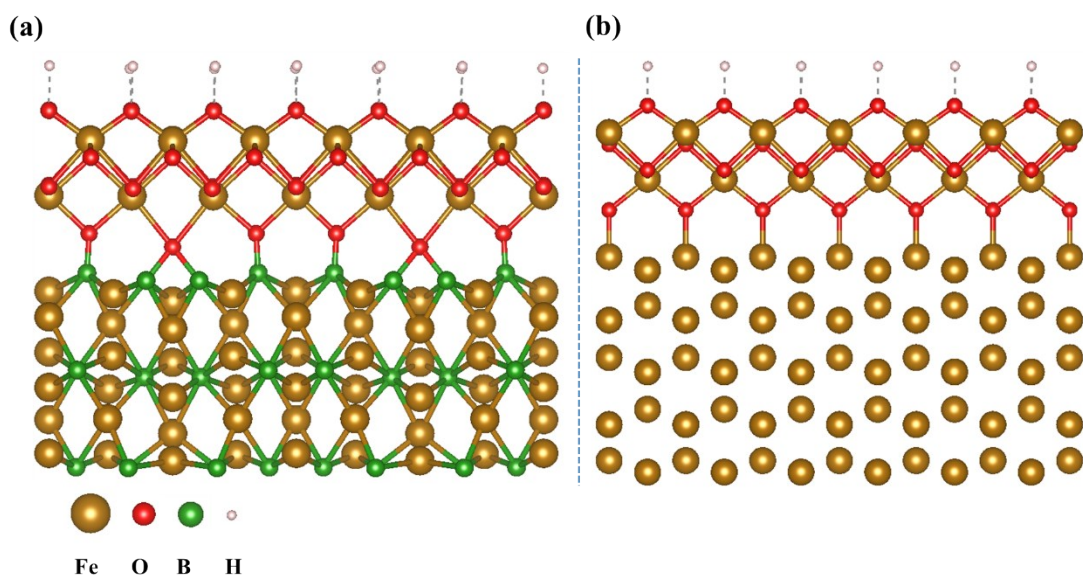

**Fig. S8** Crystal structures of slab models of FeOOH@Fe<sub>2</sub>B (a) and FeOOH@Fe (b).

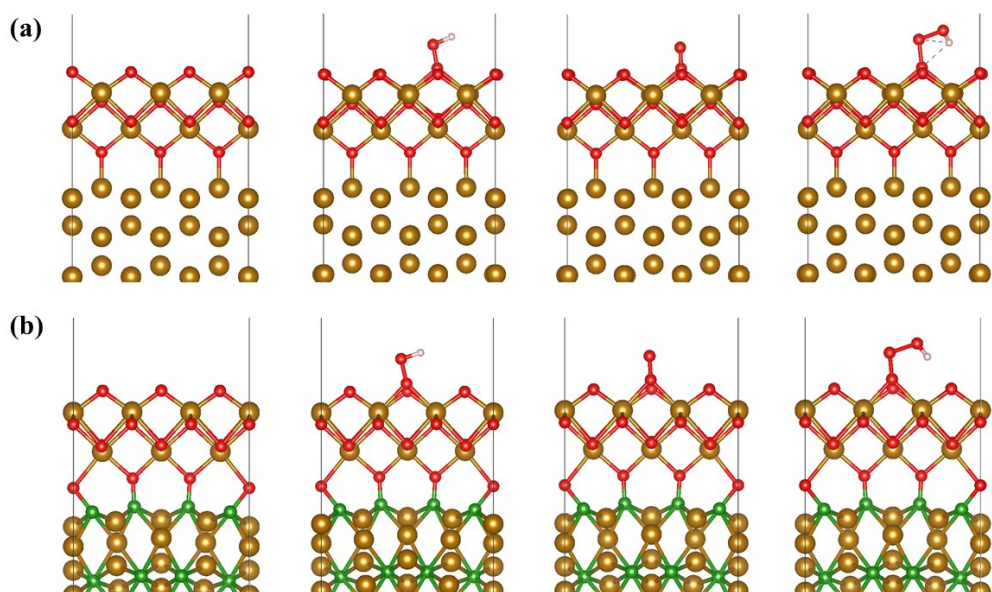

**Fig. S9** Crystal structures of OER intermediates of FeOOH@Fe (a) and FeOOH@Fe<sub>2</sub>B (b).

**Table S1.** Summary of charge transfer resistance ( $R_{ct}$ ), double-layer capacitance ( $C_{dl}$ ), electrochemical surface area (ECSA), and roughness factor (RF) for various catalysts in this study.

|                                | Fe <sub>2</sub> B NWs/NF | Fe NPs/NF | NF    |
|--------------------------------|--------------------------|-----------|-------|
| $R_{ct}$ ( $\Omega$ )          | 4.76                     | 26.89     | 8.88  |
| $C_{dl}$ (mF/cm <sup>2</sup> ) | 1.20                     | 0.85      | 0.59  |
| ECSA (cm <sup>2</sup> )        | 30                       | 21.25     | 14.75 |
| RF                             | 30                       | 21.25     | 14.75 |

**Table S2.** Summary of thermal correcting energies for OER.

| Species              | $\Delta E_{\text{ZPE}} + \Delta H - T\Delta S$ (eV) (298K) |                         |
|----------------------|------------------------------------------------------------|-------------------------|
|                      | FeOOH@Fe                                                   | FeOOH@Fe <sub>2</sub> B |
| O*                   | 0.08                                                       | 0.06                    |
| OH*                  | 0.33                                                       | 0.37                    |
| OOH*                 | 0.43                                                       | 0.41                    |
| H <sub>2</sub> (g)   |                                                            | -0.14                   |
| H <sub>2</sub> O (g) |                                                            | -0.02                   |

**Table S3.** Total energies of pure surfaces in the FeOOH@Fe and FeOOH@Fe<sub>2</sub>B models for OER

|                         | E* (eV)  | E <sub>OH*</sub> (eV) | E <sub>O*</sub> (eV) | E <sub>OOH*</sub> (eV) |
|-------------------------|----------|-----------------------|----------------------|------------------------|
| FeOOH@Fe                | -736.993 | -747.736              | -741.131             | -750.155               |
| FeOOH@Fe <sub>2</sub> B | -699.940 | -710.294              | -704.551             | -713.463               |

## Reference

1. a) A. J. Bard, L. R. Faulkner in *Electrochemical Methods: Fundamentals and Applications*, 2nd ed; Wiley, New York, 2001. b) C. C. L. McCrory, S. Jung, J. C. Peters, T. F. Jaramillo, *J. Am. Chem. Soc.*, 2013, **135**, 16977–16987. c) F. Song, X. Hu, *Nat. Commun.*, 2014, **5**, 4477.
2. H. Li, P. Wen, Q. Li, C. Dun, J. Xing, C. Lu, S. Adhikari, L. Jiang, D. L. Carroll, S. M. Geyer, *Adv. Energy Mater.*, 2017, **7**, 1700513.
3. N. Xu, G. Cao, Z. Chen, Q. Kang, H. Dai, P. Wang, *J. Mater. Chem. A*, 2017, **5**, 12379–12384.
4. G. Kresse, J. Furthmuller, *Phys. Rev. B: Condens. Matter Mater. Phys.*, 1996, **54**, 11169.
5. S. Grimme, *J. Comput. Chem.*, 2006, **27**, 1787–1799.
